# Supplementary material for: Perfectionistic Children and Their Parents: Is There Room for an Intergenerational Transmission? A Study of a Clinical Sample of Italian Children and Their Parents
Source: MDPI journal article supplement (doi:10.3390/children10030460), 2023-02-26
Supplement: s1 [file s1]

## Supplementary Materials

Table S1. Pearson correlations between parent MPS-S and children CAPS dimensions

| Variable     | MPS-SOP | MPS-OOP | MPS-SPP |
|--------------|---------|---------|---------|
| SOP-Striving | ,255**  | ,214*   | ,315**  |
| SOP-Critical | ,252*   | ,320**  | ,410**  |
| CAPS-SPP     | ,175    | ,231*   | ,272**  |

*Note.* \*\*.  $p < .01$ ; \*.  $p < .05$

Table S2. Pearson inter-correlations CAPS dimensions

| Variable     | SOP-Striving | SOP-Critical | CAPS_SPP |
|--------------|--------------|--------------|----------|
| SOP-Striving | 1            | ,607**       | ,321**   |
| SOP-Critical | ,607**       | 1            | ,483**   |
| CAPS-SPP     | ,321**       | ,483**       | 1        |

*Note.* \*\*.  $p < .01$ ; \*.  $p < .05$

Table S3. Pearson inter-correlations between MPS-S subscales

| Variable | MPS-SOP | MPS-OOP | MPS-SPP |
|----------|---------|---------|---------|
| MPS-SOP  | 1       | ,697**  | ,640**  |
| MPS-OOP  | ,697**  | 1       | ,660**  |
| MPS-SPP  | ,640**  | ,660**  | 1       |

*Note.* \*\*.  $p < .01$ ; \*.  $p < .05$

Table S4. Pearson correlations between CAPS subscales and HiPIC dimensions

| Variable             | SOP-Striving | SOP-Critical | CAPS-SPP |
|----------------------|--------------|--------------|----------|
| Anxiety              | ,265**       | ,225*        | ,050     |
| Self-confidence      | ,117         | -,108        | -,124    |
| Energy               | ,076         | ,044         | ,051     |
| Expressiveness       | ,009         | ,110         | ,026     |
| Optimism             | ,093         | ,022         | -,072    |
| Shyness              | ,230*        | ,166         | ,071     |
| Creativity           | ,234*        | ,206*        | ,069     |
| Intellect            | ,318**       | ,094         | -,123    |
| Curiosity            | ,083         | ,073         | -,134    |
| Altruism             | ,219*        | -,033        | -,067    |
| Dominance            | -,034        | ,266**       | ,124     |
| Egocentrism          | ,068         | ,262**       | ,248*    |
| Compliance           | ,086         | ,115         | -,013    |
| Irritability         | ,023         | ,051         | ,030     |
| Concentration        | ,152         | ,094         | ,008     |
| Perseverance         | ,059         | ,012         | -,018    |
| Order                | -,020        | ,147         | ,015     |
| Achievement striving | ,203*        | ,312**       | -,059    |
| Emotional Stability  | -,106        | -,071        | ,081     |
| Extraversion         | -,062        | ,042         | -,008    |
| Imagination          | ,290**       | ,179         | -,088    |
| Benevolence          | ,239*        | -,009        | -,072    |
| Conscientiousness    | ,193         | ,259**       | -,065    |

Note. \*\*.  $p < .01$ ; \*.  $p < .05$
